# Supplementary material
Source: publisher site journal article supplement (http://www.degruyter.com/publication/journal_key/EHS/downloadAsset/EHS_Instructions%20for%20Authors.pdf)
Supplement: Supplementary file 1 [file EHS_Instructions%20for%20Authors.pdf]

# Energy Harvesting and Systems (EHS)

## Instructions for Authors

### I. Editorial policy of EHS

Energy Harvesting and Systems is a peer-reviewed journal that publishes original articles, reviews, letters, and rapid communication. Manuscripts are independently reviewed by peers selected by the Editors. All submissions are processed on an expedited schedule. When manuscripts are accepted subject to revision, the revised manuscript will be returned as soon as possible. Accepted papers are promptly published online ahead-of-print as soon as processed.

**Reviewers:** The authors should provide the names and e-mail addresses of up to 3 potential reviewers. The journal reserves the right to reject submissions that are outside the aims and scope of EHS for poor grammar or English language, have serious scientific flaws, or are insufficiently novel. Papers meeting the criteria of EHS are subjected to single-blind peer review. The journal Editors have the final decision to accept or reject an article; the Editors' decision is final.

**Unpublished material:** Submission of a manuscript to EHS implies that the work described is not copyrighted, published or submitted elsewhere, except in abstract form. The corresponding author should ensure that all authors approve the manuscript before it is submitted.

**Ethical conduct of research:** The authors must describe and confirm safeguards to meet ethical standards.

**Conflict of interest:** When authors submit a manuscript, they are responsible for recognizing and disclosing financial and/or other conflicts of interest that might bias their work and/or could inappropriately influence his/her judgment. If no specified acknowledgement is given, the Publisher assumes that no conflict of interest exists.

**Copyright:** Manuscripts are accepted on condition of transfer of copyright (for U.S. government employees: to the extent transferable) to EHS. Once the manuscript is accepted, it may not be published elsewhere without the consent of the copyright holders.

### II. Submission of manuscripts

The manuscript and review process is handled through ScholarOne Manuscripts. All manuscripts should be submitted exclusively online at: <http://mc.manuscriptcentral.com/ehs>.

**Cover letter:** Each manuscript should be accompanied by a cover letter containing a brief statement by the authors as to the element of novelty of their research.

#### Preparation of manuscripts

**Language:** Manuscripts should be written in clear and concise English. It is recommended that your text is proofread by a native English speaker before you submit it for consideration if there is a reason to doubt your proficiency with respect to spelling, grammar, etc. DeGruyter provides copyediting of accepted manuscripts, but poor grammar or English language may result in rejection of a manuscript. At the proof stage, only minor changes other than corrections of printers' errors are allowed.

#### General format and length

**Original research articles** should not exceed 8 - 10 printed pages, including all tables, illustrations, references, etc. It is expected that such articles will be the core of material published in EHS. **Review articles** should not exceed 15 printed pages. **Letters** should not exceed 4 printed pages. **Rapid communication** should not exceed 2 printed pages. Each full page of printed text corresponds to approximately 1000 words.

**Sections:** Articles should have Title page, Abstract, Keywords, Introduction, Methods, Results, Discussion, Acknowledgements and List of Non-standard Abbreviations (if applicable), References, Table and Figure Legends (if applicable). Letters and Rapid Communications do not require separate sections.

**Title page:** The title page should include (a) a short and informative full article title; (b) names all authors, followed by their affiliations (department, institution, city with postal code, country); (c) mailing address, fax, phone number, and email

address of the corresponding author. If there is more than one institution involved in the work, authors' names should be linked by superscript consecutive numbers to the appropriate institutes.

**Abstract and Key Words.** The second page of the manuscript should contain the Abstract and Key Words. The Abstract should be a single paragraph of approximately 150-250 words. Abbreviations and reference citations should be avoided. Below the Abstract, 5 or more keywords should be given in alphabetical order and separated by semi-colons.

#### Acknowledgements

Acknowledgements should be placed at the end of the article before the references. Names of funding organizations should be written in their entirety.

#### References

Within the text, references should be cited by author and date. The references at the end of the text should be listed in alphabetical order and should include complete titles. Please see: <http://www.lib.monash.edu.au/tutorials/citing/harvard.html> or APA Style Examples, Citing and Referencing Tutorial, Monash University Library.

Journal names should be abbreviated. Online resources for full journal names and their abbreviations can be found at:

- <https://woodward.library.ubc.ca/woodward/research-help/journal-abbreviations>
- <https://cassi.cas.org/search.jsp>

#### References should be given in the following format:

- **Journal Articles:** K. Singh, V. Bedekar, S. Taheri and S. Priya, "Piezoelectric Vibration Energy Harvesting Systems with an Adaptive Frequency Tuning Mechanism for Intelligent Tires" *Mechatronics* 22, 970 (2012).
- **Articles ahead of print (DOI):** S. Chandarak, N. Ratchasima, J. Jutimoosik, A. Athipong, M. Unruan, P. Jantaratana, S. Priya, S. Srilomsak, S. Rujirawat, Y. Yimnirun, "Local Structure of Magnetoelectric BiFeO<sub>3</sub>-BaTiO<sub>3</sub> Ceramics Probed by Synchrotron X-Ray Absorption Spectroscopy", *J. Superconductivity Novel Magn.*, (2012) DOI: 10.1007/s10948-012-1764-1.
- **Books and monographs:** Lead Free Piezoelectrics, Springer, 1 edition, NY (January 2012) (Editors: Shashank Priya and Sahn Nahm).
- **Chapters in a book:** S. Gupta, D. Maurya, Y. Yan, and S. Priya, "Development of KNN-based piezoelectric materials", in the book Lead Free Piezoelectrics, Springer, 1 edition, NY (January 2012) (Editors: Shashank Priya and Sahn Nahm).

#### Formatting

Manuscripts should be submitted as Word (docx, rtf) or LaTeX files. For authors working with LaTeX files, please find the related files and documentation, including a template for author use and instructions [here](#).

#### Mathematics and equations

- Ensure equations are typed or created with a plug in, such as *Word Formula Editor* or *MathType* if you are not using *LaTeX*. Mathematical expression should not be displayed as images.
- Type short mathematical expressions in line.
- Longer expressions must appear as display math, as must expressions using many different levels (e.g., fractions).
- Roman letters used in mathematical expressions must be italicized. Roman letters used as a part of multi-letter function names should not be italicized. Subscripts and superscripts must be a smaller font size than the text.
- Number equations sequentially.
- Insert a blank line before and after each equation.

**Nomenclature:** Authors are asked to follow the recommendations of the Système International d'Unités (SI).

**PDF version:** If your manuscript contains special characters, equations, etc., please submit a PDF version as a reference file.

This will ensure any formatting issues introduced during the submission process can be corrected accurately.

#### **Tables, figures and graphs**

**General requirements:** All illustrations must be reproduction-ready quality and in EPS, TIF, or JPG format. They will be reduced in size to fit, whenever possible, the width of a single column. Lettering of all figures within the article should be uniform in style (preferably a sans serif type face such as Helvetica) and of sufficient size (ca. 8 pt.). Uppercase letters A, B, C, etc., should be used to identify parts of a multi-part figure. Cite all figures in the text in numerical order. Indicate the approximate placement of each figure. Do not embed figures within the text body of the manuscript; submit figures in separate files. Only figures (graphs, line drawings, photographs, etc.) should be labeled as “figures,” not tables or equations.

**Tables:** Submit tables on separate pages and number them consecutively using Arabic numerals. Provide a short descriptive title, column headings, and (if necessary) footnotes to make each table self-explanatory. Refer to tables in the text as Table 1, etc. Use Table 1, etc., in the table legends. Tables must not be displayed as images.

**Halftone figures (grayscale and color)** should have a minimum resolution of 1200 DPI and be of good contrast. Authors are welcome to submit color illustrations. Online publication of color figures is free of charge.

**Line drawings** must be of reproduction-ready quality. Please note that faint shading may be lost upon reproduction. When drawing bar graphs, use patterning instead of grey scales. Lettering of all figures should be uniform in style. A resolution of 1200 DPI is recommended.

**Figure legends:** Provide a short descriptive title and a legend to make each figure self-explanatory on separate pages. Explain all symbols used in the figures. Remember to use the same abbreviations as in the text body.

**Permissions:** It is the authors' responsibility to obtain permission to reproduce original or modified material that has been previously published.

**Offprints:** The electronic files of typeset articles in Adobe Acrobat PDF format are provided free of charge; corresponding authors receive notification that their article has been published online. Paper offprints can be ordered in addition; an offprint order form will accompany the page proofs and should be completed and returned with the corrected proofs immediately.

#### **Editorial Office contact:**

Energy Harvesting and Systems Editorial Office  
De Gruyter  
Genthiner Strasse 13, D-10785 Berlin  
Germany  
Email: [torsten.krueger@degruyter.com](mailto:torsten.krueger@degruyter.com)
